# Supplementary material
Source: Springer Nature journal article supplement (https://www.springermedizin.de/resource/supplementary/12865_2009_280_MOESM4_ESM.pdf/9427668)

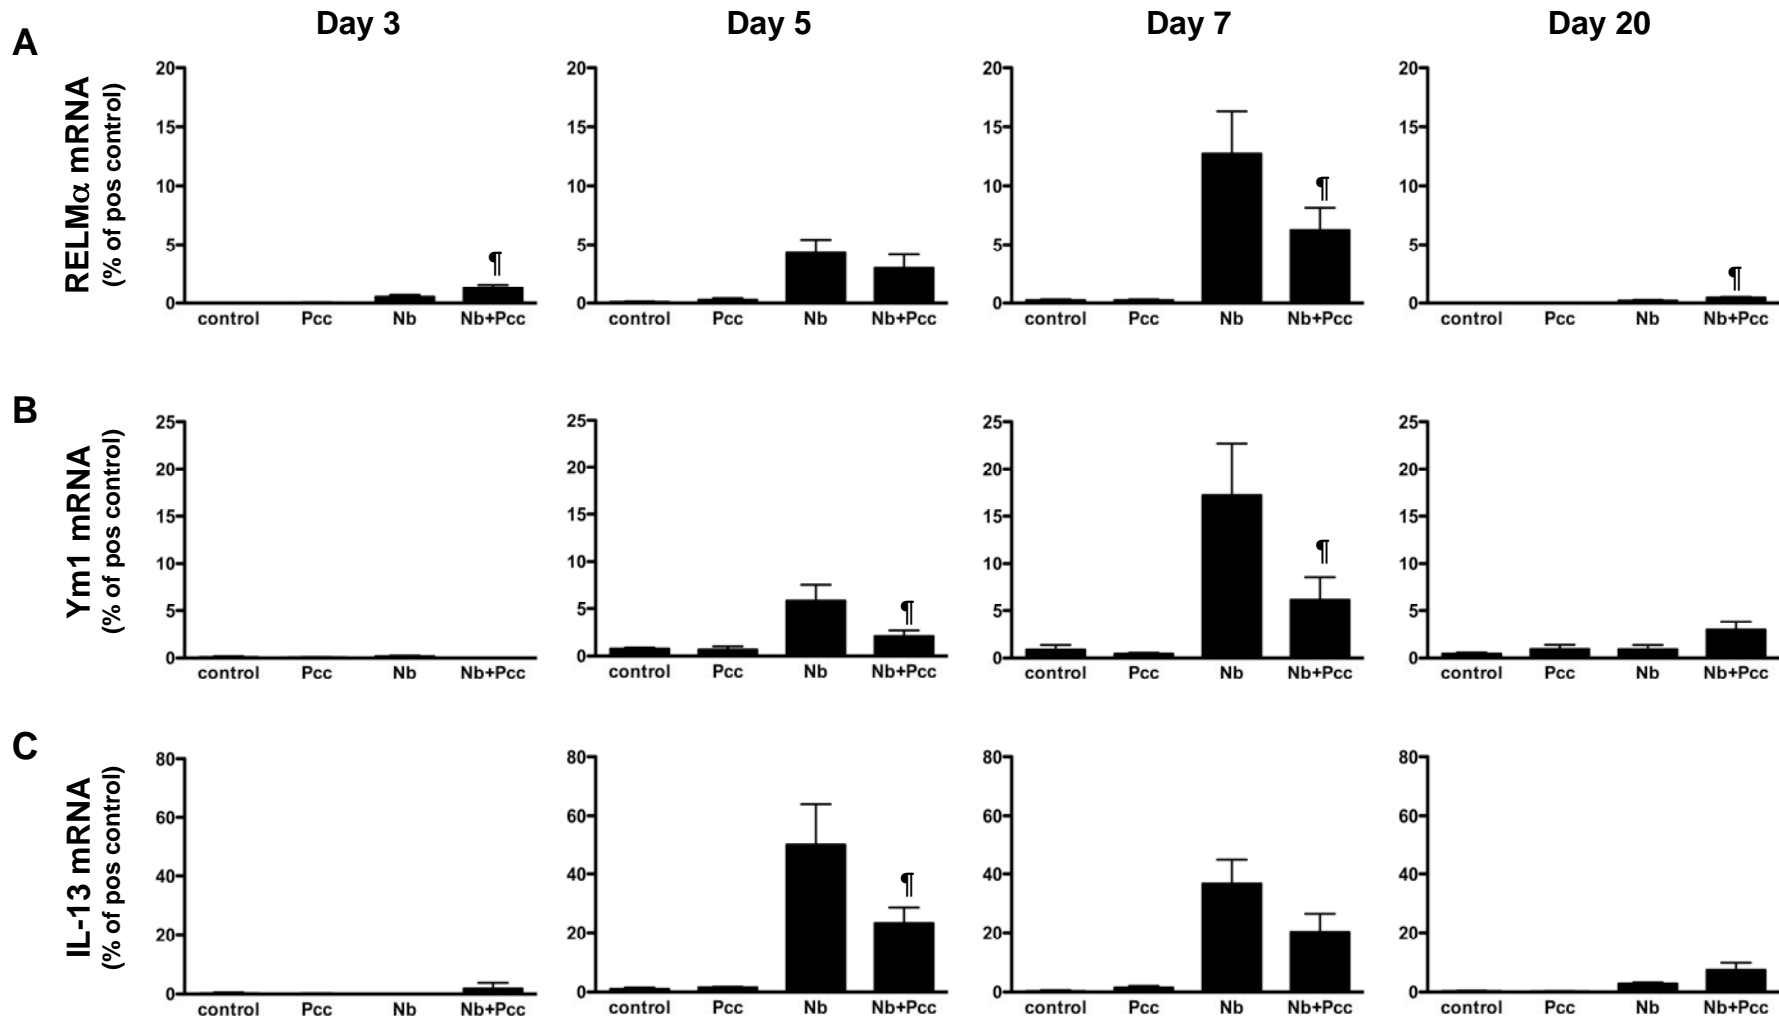

Supplement: MOESM4 [file 9427668]
